# Supplementary material for: Participatory Evaluation of Water Management Options for Climate Change Adaptation in River Basins
Source: MDPI journal article supplement (doi:10.3390/environments8090093), 2021-09-10
Supplement: s1 [file s1]

Archive with 1 entries (1 files):
- environments-1343594-supplementary.pdf
